# Supplementary figures and images for: Fecal microbiota transplant improves cognition in hepatic encephalopathy and its effect varies by donor and recipient
Source: PubMed Central journal article supplement — Hepatol Commun. 2022 Apr 5;6(8):2079–89. doi: 10.1002/hep4.1950 (PMC9315114; doi:10.1002/hep4.1950), 2022-04-05

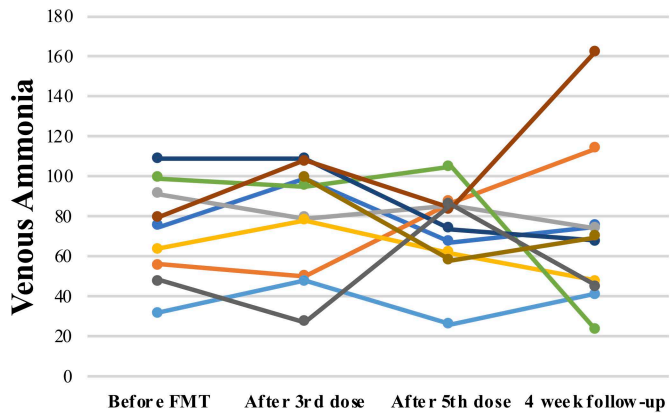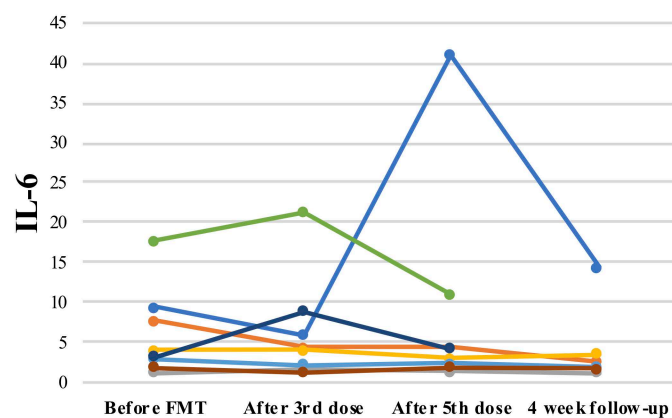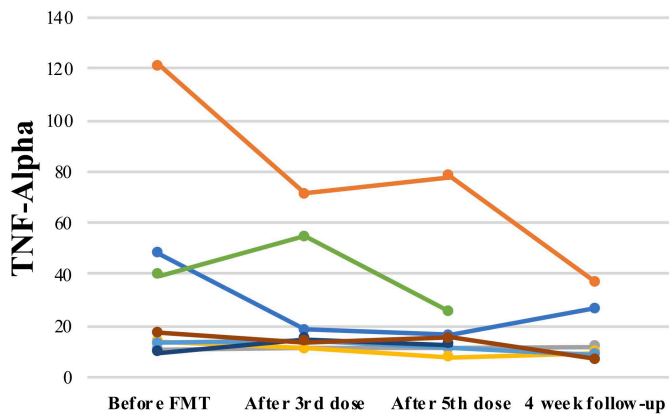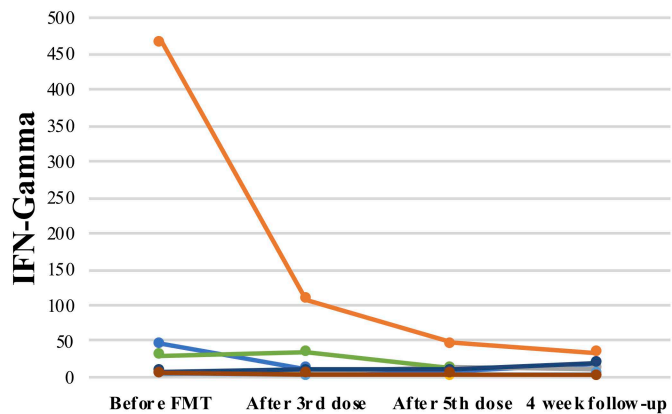

Supplement: HEP4-6-2079-s009.pdf [file HEP4-6-2079-s009.pdf]
